1 **A contribution to the larval amphibian microbiome: characterization of**  
2 **bacterial microbiome of *Ichthyophis bannanicus* (Order: Gymnophiona)**  
3 **and comparison with the other two amphibian orders**

4

5 Amrapali Prithvisingh Rajput<sup>1</sup>, Shipeng Zhou<sup>1</sup>, Madhava Meegaskumbura<sup>1</sup>

6 <sup>1</sup>Eco.Evo.Devo Lab-Group, Guangxi Key Laboratory of Forest Ecology and Conservation,

7 College of Forestry, Guangxi University, Nanning, Guangxi, People's Republic of China

8

9 **Running title:** A larval caecilian microbiome

10

11 **Corresponding Author:**

12 Madhava Meegaskumbura

13 100 Daxue Road, Nanning, Guangxi, 530004, People's Republic of China

14 **E-mail address:** [madhava\\_m@mac.com](mailto:madhava_m@mac.com)

15

16

17

18

19

20

21

22

23

24

25 **ABSTRACT**

26 It is known that animal-associated microbiomes form indispensable relationships with hosts  
27 and are responsible for many functions important for host-survival. Next-gen driven  
28 approaches documenting the remarkable diversity of microbiomes have burgeoned, with  
29 amphibians too, benefiting from such treatments. The microbiome of Gymnophiona  
30 (caecilians), one of the three amphibian orders, constituting of 3% of amphibians, however,  
31 remains almost unknown. The present study aims to address this knowledge gap through  
32 analysis of the microbiome of *Ichthyophis bannanicus*. As these caecilian larvae are aquatic  
33 and hence exposed to a greater propensity for bacterial microbiomic interchange, we  
34 hypothesize that bacterial phyla would overlap between gut and skin. Further, from the host-  
35 specificity patterns observed in other vertebrate taxa, we hypothesize that Gymnophiona have  
36 different dominant gut bacterial microbiomes at a higher taxonomic level when compared to  
37 the larvae of the other two amphibian orders (Anura and Caudata). We used 16S rRNA gene  
38 amplicon sequencing based on Illumina Nova sequencing platform to characterize and  
39 compare the gut (represented by faecal samples) and skin microbiome of *I. bannanicus* larvae  
40 ( $N = 13$ ), a species distributed across South-East-Asia and the only caecilian species  
41 occurring in China. We compared our gut microbiome results with published anuran and  
42 caudate larval microbiomes. For *I. bannanicus*, a total of 4,053 operational taxonomic units  
43 (OTU) across 13 samples were detected. Alpha-diversity indices were significant between  
44 gut and skin samples. Non-metric multidimensional scaling analysis suggest that gut and skin  
45 samples each contained a distinct microbiome at OTU level. We record significant  
46 differences between the bacterial phyla of gut and skin samples in larvae of *I. bannanicus*.  
47 The study provides an overview of gut and skin bacterial microbiomes of a caecilian, while  
48 highlighting the major differences between larval microbiomes of the three amphibian orders.  
49 We find a partial overlap of gut bacterial microbiomes at phylum level for the three orders;

50 however, the relative abundance of the dominant phyla is distinct. The skin and gut  
51 microbiomes are distinct with little overlap of species, highlighting that gut-skin axis is weak.  
52 This in turn suggests that many of the microbial species on skin and gut are functionally  
53 specialized to those locations. We also show that the skin microbiome is more diverse than  
54 the gut microbiome at species level; however, a reason for this could be a portion of the gut  
55 microbiome not being represented in faecal samples. These first microbiome information  
56 from a caecilian lay the foundation for comparative studies of the three amphibian orders.

57

58 **Keywords:** amphibia, gut-skin axis, *Ichthyophis bannanicus*, metabarcoding, 16S rRNA

59

## 60 INTRODUCTION

61 The bacterial microbiome (BM), shaped by the life-history strategies and phylogenetic  
62 relationships of hosts, is now known to be closely associated with host well-being (*Hanning*  
63 *& Diaz-Sanchez, 2015; Davenport et al., 2017*). Among vertebrates, amphibians are  
64 highlighted as having complex life cycles, reproductive mode diversity, occupation of a  
65 diversity of habitats, a multitude of food preferences (*Wilbur, 1980; Duellman & Trueb,*  
66 *1986; McDiarmid & Altig, 1999*), and hence are expected to show microbiome assemblages  
67 reflective of these life history strategies. Among recent amphibian BMs studied (between  
68 2005-2020), a lion's share pertains to anurans (frogs and toads, 89%), with urodeles  
69 (salamanders and newts, 11%) constituting the remainder. An entire order, Gymnophiona  
70 (caecilians), remains unstudied (*Wiggins et al., 2011; Mashoof et al., 2013; Kohl et al., 2013,*  
71 *2014, 2015; Bletz et al., 2016; Chang et al., 2016; Vences et al., 2016; Weng et al., 2016;*  
72 *Zhang et al., 2016; Knutie et al., 2017, Warne et al., 2017; Demircan et al., 2018; Huang et*  
73 *al., 2018; Lyra et al., 2018; Mu et al., 2018; Zhang et al., 2018; Tong et al., 2019a, b; Warne*  
74 *et al., 2019; Ya et al., 2019; Long et al., 2020; Xu et al., 2020; Zhang et al., 2020*). This

75 pattern of study emphasis of host BMs appears to reflect the diversity of species of the three  
76 orders – of a total of 8,176 amphibian species, 7,212 are Anura (frogs and toads, 88%) and  
77 750 are Caudata (newts and salamanders, 9%), while only 214 are Gymnophiona (caecilians,  
78 3%) (*Amphibiaweb*, 2021).

79 Gymnophiona occur across much of the wet tropics and some subtropical regions  
80 apart from Madagascar, Australia, South-East Asia and East of Wallace’s line (*Taylor*, 1968).  
81 *Ichthyophis bannanicus* is the only caecilian species found in China (*Wang et al.*, 2015).  
82 These legless amphibians that lead a fossorial or aquatic life, are secretive and difficult to  
83 locate. Known as Banna caecilian, the species ranges across Southern China. It has an aquatic  
84 larval stage of about two years (*Li et al.*, 2010) and a fossorial post-metamorphic stage during  
85 which it rarely enters water bodies (*Meng & Li*, 2006). Almost nothing is known of the BMs  
86 of larval or the adult caecilians.

87 Gut microbial diversity is known to be influenced by the growth environment,  
88 developmental stages, and health conditions of the host (*Tong et al.*, 2019a; *Long et al.*,  
89 2020). As amphibians metamorphose, their symbiotic gut BM also alters, providing  
90 nutritional needs depending on food habits and habitat of the relevant life-history stage  
91 (*Zhang et al.*, 2020). The role of digestion and nutrient uptake by the BM ranges from the  
92 breakdown of various complex food sources into easily absorbable nutrients, to the  
93 manufacturing of secondary metabolites. Studies on *Lithobates pipiens*, the Northern leopard  
94 frog, suggest that the gut microbial diversity of tadpoles is similar to that of fishes, while the  
95 adult gut microbiota is similar to that of terrestrial vertebrates (*Kohl et al.*, 2013). Hence, the  
96 biphasic life histories of aquatic larval stages and semi-terrestrial adults of amphibians  
97 (*Wilbur*, 1980) makes amphibians an ideal system to study the gastrointestinal bacteria and  
98 their role in enhancing host’s life processes.

99           Furthermore, amphibian skin, by providing a moist respiratory surface, is suitable for  
100 rich communities of microorganisms, both beneficial and detrimental to the host. However,  
101 the skin of an amphibian also has poison glands that discourage certain microbes. It is known,  
102 however, that the amphibian skin microbiome plays a vital role as symbionts, protecting their  
103 hosts against disease (*Rebollar et al., 2020*). Symbiotic skin bacteria may provide resistance  
104 to pathogens either by producing metabolites that directly impede pathogen growth, or by  
105 stimulating the host immune system (*Bletz et al., 2013*). As caecilian larvae are aquatic, the  
106 skin and gut may host similar microflora. Thus, the gut-skin axis is assumed to have  
107 beneficial roles by protecting the host species from diseases while helping in the re-  
108 colonization of essential BMs.

109           Here we focus on Gymnophiona, represented by the larvae of *I. bannanicus*. Our  
110 objective is to study the BM of gut (fecal samples were used as a proxy for the gut) and skin.  
111 As the larvae are aquatic, the skin is inhabited by microbes present in waterbodies. Caecilians  
112 feed on organisms inhabiting waterbodies; at the same time, water enters the digestive system  
113 while feeding, but the stomach acts as a filter for the progression of certain bacteria to the  
114 lower gut. Thus, we hypothesize that some of the bacterial phyla would overlap between gut  
115 and skin. As caecilian larvae have a carnivorous lifestyle, as opposed to the larvae of anurans  
116 and caudates, we hypothesize that the gut microbiota of *I. bannanicus* would be distinct at a  
117 higher taxonomic level.

118           Since the skin of larval caecilians sheds periodically, and the larvae live in an aquatic  
119 medium, we hypothesize that skin is recolonized from bacteria living in the gut through fecal  
120 transmission. Hence, we expect the skin BM to be less diverse than the gut BM. We  
121 investigate the BM using high-throughput sequencing of the bacterial 16S rRNA gene  
122 fragment.

123 Our study reveals that although the bacterial diversity of the gut partially overlaps the  
124 larvae of the three amphibian orders, the relative abundance of dominant phyla remains  
125 distinct. However, we observed that the skin BM was more diverse than that of the gut, we  
126 discuss an explanation for this.

127

## 128 **MATERIALS AND METHODS**

129

130 *This study was carried out in accordance with the approval of Institutional Animal Care and*  
131 *Use Committee of Guangxi University (GXU), Nanning-China. Animal procedures were by*  
132 *GXU approval document (#GXU2019-071).*

133

### 134 **Sample Collection**

135 Larvae of *I. bannanicus* were obtained from a pet-market and maintained in the laboratory.  
136 They were reared in plastic boxes consisting of dechlorinated water (3 cm, height). The water  
137 was renewed every two days. Caecilians were reared on frozen blood worms. Sample  
138 collection for gut samples ( $N = 13$ ) was carried out by placing the test subjects temporarily in  
139 sterile water. As soon as the caecilian defecated, the sample was collected using a sterile  
140 dropper. Skin swabs were collected immediately before placing the larvae in sterile water.  
141 Vials containing samples were immediately frozen at  $-86\text{ }^{\circ}\text{C}$  until DNA extraction. All  
142 samples from the test subjects were collected at larval development stage 37 (*Dunker et al.,*  
143 *2000*). Morphometric measurements (i.e., body weight, gm; body width, mm; and total  
144 length, mm) were recorded for each individual (Table S1). Sterile conditions were maintained  
145 throughout the procedures to prevent contamination of samples.

146

### 147 **DNA Extraction**

148 Bacterial genomic DNA was extracted from larval gut and skin according to the  
149 manufacturer's protocol, with the aid of Power Soil kits and DNA Tissue-Blood kits  
150 (QIAGEN, Hilden Germany). The robustness of the DNA was visually monitored using 1.0%  
151 agarose gel electrophoresis and quantified using a Qubit and NanoDrop. Hyper-variable  
152 regions of the 16S rRNA gene (V3-V4) were PCR-amplified from genomic DNA using the  
153 bacteria-specific universal barcode-primers 515F and 806R. All polymerase chain reactions  
154 were performed using 15  $\mu$ L of Phusion <sup>®</sup> High-Fidelity PCR Master Mix, 0.2  $\mu$ M of each  
155 forward and reverse primer and 10 ng of DNA template. Thermal cycling conditions were as  
156 follows: initial denaturation at 98 °C for 1 min, followed by 30 cycles of denaturation at 98  
157 °C for 10 s, annealing at 50 °C for 30 s, elongation at 72 °C for 30 s and final extension at 72  
158 °C for 5 min.

159

### 160 **Illumina Library Preparation**

161 Amplicons of each PCR sample were extracted by mixing same volume of 1X loading buffer  
162 containing SYB green with PCR products and further electrophoresis was operated on 2%  
163 agarose gel for detection. PCR products were mixed in equidensity ratios. The PCR products  
164 were further purified using Qiagen Gel Extraction Kits. The sequencing libraries were  
165 generated using TruSeq<sup>®</sup> DNA PCR-Free Sample Preparation Kit following the  
166 manufacturer's protocol, followed by the addition of index codes. Evaluation of library  
167 quality was performed on a Qubit<sup>®</sup> 2.0 Fluorometer and Agilent Bioanalyzer 2100 system.  
168 Further, the library was sequenced on an Illumina NovaSeq platform and 250 bp paired-end  
169 reads were generated. Paired-end reads were assigned to the samples based on their unique  
170 barcode, truncated by cutting off the barcode and primer sequence. The paired-end reads  
171 were further merged using FLASH and the sequences spliced. The quality filtering was  
172 performed according to the QIIME (Version 1.9.1) quality control protocol (*Caporaso et al.*,

173 2010). The tags were compared with reference database using UCHIME algorithm to detect  
174 chimera sequences, and effective tags were thus obtained.

175

### 176 **16S rRNA Gene Sequence Analysis**

177 Sequence analysis was performed using Uparse software. Sequences with approximately 97%  
178 similarity were assigned to the same OTUs (*Rideout et al., 2014*). A representative sequence  
179 for each OTU was screened for further annotation. For each representative sequence, the  
180 SILVA database, which uses the Mothur algorithm, was used to annotate the taxonomic  
181 information. To study phylogenetic relationships of different OTUs and the differences  
182 amongst the dominant species in different samples, multiple sequence alignment was  
183 conducted using MUSCLE software. OTUs abundance information was further normalized  
184 using the standard sequence number corresponding to the sample with least sequences. The  
185 SILVA 123 database was implied for taxonomic assignment. Reference sequences in the  
186 SILVA 123 database were initially trimmed to hypervariable region (V3-V4) with 515F-  
187 806R universal primers used in the PCR. Taxonomic assignments were carried out using  
188 UCLUST with a minimum confidence threshold of 80% (*Edgar, 2010*). Libraries containing  
189 at least 1,000 reads were used for analysis, and sub-OTU relative abundance values were  
190 calculated by transformation to library read depth. We used circled legend and bar plot to  
191 show the microbial composition of each sample using R (4.1.1, “amplicon” package; Liu *et*  
192 *al.*, 2015).

193

### 194 **Data Availability**

195 All the raw metagenomic data is available through the National Center for Biotechnology  
196 (NCBI) with the BioProject accession number PRJNA764182.

197



## 198 **Data Analysis**

199 Alpha and beta diversity were calculated using QIIME 1.9.1 version. Alpha diversity indices  
200 were compared using Wilcox rank-sum test, to estimate community diversity indices  
201 (Shannon; Simpson) and community richness indices (Abundance-based coverage estimator-  
202 ACE; Chao1). Beta diversity was calculated with unweighed UniFrac, weighed UniFrac and  
203 Bray-Curtis metrics (*Lozupone & Knight, 2005*). To estimate the gut and skin bacterial  
204 diversity we used “ggplot2” and “ggsignif” packages in R (4.1.1 version).

205 The Bray-Curtis distance for abundance was used to generate non-metric  
206 multidimensional scaling (NMDS) to visualize beta diversity patterns and reflect the inter and  
207 intra group differences using R (4.11, “vegan” and “ggplot2” packages). To test if the group  
208 dispersion (gut/skin), one way of similarity (ANOSIM) was performed based on OTUs. To  
209 investigate differences in the microbial community structure between the gut and skin  
210 samples, unifrac distance across each sample was implemented to generate UPGMA trees  
211 (unweighed pair-group method with arithmetic mean) using R (“hclust”). The difference  
212 between gut and skin microbial diversity at phylum level was analyzed using t-test.

213 Linear discriminant analysis effect size (LEfSe) was used to identify whether sub-  
214 OTUs significantly differ amongst gut and skin samples (*Segata et al., 2011*). The threshold  
215 in Kruskal-Wallis test amongst groups was considered to be statistically significant at  $P <$   
216 0.05. The taxa with a log LDA score (Linear discriminant analysis) more than four orders of  
217 magnitude were considered. Network analysis was conducted to show the co-occurrence and  
218 co-exclusion relationships among the abundances of clades in the gut samples *I. bannanicus*  
219 larvae.

220

## 221 **RESULTS**

222 By splicing reads (sequencing based on the Illumina Nova sequencing platform by  
223 constructing a PCR-free library, followed by Paired-End sequencing), an average of 68,901  
224 tags were measured per sample, and 66,100 effective data were obtained after quality control.  
225 The effective data volume of quality control reached 60,598, and the effective rate of quality  
226 control reached 87.98%. The read depths of the libraries were sufficient to capture the BM in  
227 both gut and skin, given that all libraries reached saturation in the rarefaction curve (Fig. 1A;  
228 Table 1). The rank abundance curve directly reflected the richness of bacterial communities  
229 in the samples (Fig. 1B). The BM in each of the gut and skin samples reached saturation in  
230 the rarefaction curve (Fig. S1). The rank abundance curve directly reflected the richness of  
231 bacterial communities in each of the gut and skin samples (Fig. S1).

232 The sequences were classified into 4,053 operational taxonomic units based on 97%  
233 sequence identity using QIIME 1.9.1 version (*Caporaso et al., 2010*). A total of 1,429  
234 (35.26%) genera were identified when OTU sequences were tallied against the Silva123  
235 database and annotated for taxon identity. The unique and commonly shared OTUs between  
236 the samples showed that, the highest frequency of OTUs were observed on skin samples  
237 when compared to the gut samples (Table S2).

238

### 239 **Bacterial abundance in gut and skin samples of *I. bannanicus***

240 The composition of the BM of gut samples in *I. bannanicus* was analyzed at six classification  
241 levels. At phylum level (Fig. 1C) Bacteroidetes, Proteobacteria, Firmicutes and  
242 Verrucomicrobia were dominant, accounting for 62.32%, 21.70%, 9.45% and 4.50% of  
243 OTUs respectively. Bacteroidia, Gammaproteobacteria and Clostridia were the dominant  
244 classes, which accounted for 62.32%, 20.79% and 8.38% of OTUs, respectively (Fig. S2A).  
245 At order level Bacteroidales (61.48%), unidentified\_Gammaproteobacteria (17.17%) and  
246 Verrucomicrobiales (4.5%) were dominant (Fig. S2B). Members of Tannerellaceae (15.35%),

247 unidentified\_Gammaproteobacteria (9.00%) and Burkholderiaceae (7.17%) were dominant at  
248 family level (Fig. S2C). *Macellibacteroides* (11.44%) and *Laribacter* (8.98%) were the  
249 dominant genera (Fig. 1D). *Akkermansia glycaniphila* (3.96%), *Alcaligenaceae bacterium*  
250 BL-169 (3.54%) and *Bacteroides neonati* (0.97%) were dominant species in the gut samples  
251 (Fig. S2D).

252 The composition of BMs at six classification levels were analyzed for skin samples of  
253 *I. bannanicus*. At phylum level (Fig. 1C), Proteobacteria (64.49%), Bacteroidetes (20.93%),  
254 Actinobacteria (8.36%) and Verrucomicrobia (2.09%) were dominant. At class level (Fig.  
255 S2A). Gammaproteobacteria and Bacteroidia were dominant, accounting for 57.93% and  
256 20.88%, respectively. Unidentified\_Gammaproteobacteria, Flavobacteriales and  
257 Pseudomonadales were the dominant orders (Fig. S2B) constituting of 41.85%, 14.63% and  
258 9.36% of OTUs, respectively. At family level, members (Fig. S2C) of Burkholderiaceae  
259 (38.69%), Flavobacteriaceae (10.38%) and Puseudomonadaceae (8.15%) were dominant.  
260 *Flavobacterium* and *Pseudomonas* were dominant members at genus (Fig. 1D) level,  
261 consisting of 10.28% and 8.14% of OTUs, respectively. Dominant species (Fig. S2D) were  
262 *Microbacterium oxydans* (3.73%), *Sanguibacter inulinus* (1.51%) and *Klebsiella pneumoniae*  
263 (1.02%).

264

## 265 **Alpha and beta diversity**

266 Comparison of alpha diversity indices were significant between gut and skin samples that  
267 were detected using the Wilcox test. The ACE (Fig. 2A) and Shannon index (Fig. 2B) of *I.*  
268 *bannanicus* skin microbiota samples were significantly higher than that of the gut microbiota  
269 samples. Both community richness and community diversity in *I. bannanicus* were distinct  
270 between gut and skin samples (Fig. S3).

271 To reveal compositional change we conducted Non-metric multidimensional scaling  
272 analysis (NMDS) between the gut and skin samples (Fig. 2C; Fig 2D) based on the OTUs and  
273 found both samples clustered separately for both weighed unifracs distance ( $R = 0.99$ ;  $P =$   
274  $0.001$ ; Fig. S4C) as well as for the unweighed unifracs distance ( $R = 1$ ;  $P = 0.001$ ; Fig. S4D).

275

### 276 **Microbial diversity across gut and skin samples of *I. bannanicus***

277 Results for the UPGMA weighed unifracs distance analysis showed that relative abundance  
278 and distribution of bacteria may be indicative of variation in the samples of gut and skin  
279 microbiome composition (Fig. 2E).

280

### 281 **Unique and shared microbial taxa**

282 The indicator OTU concept provided a framework for investigating the differences of  
283 microbial communities in the two groups (gut and skin) at species level. The gut samples  
284 shared exclusively 32 OTUs in common (Fig. 3A) at species level. Further, 61 OTUs were  
285 exclusively shared in the skin samples shared (Fig. 3B) at species level. Results obtained by  
286 conducting t-test (Table S3; Fig. 3C) revealed significant differences in the microbial  
287 diversity between gut and skin samples at phylum level. The skin samples had higher  
288 diversity when compared to the gut samples (Fig. S4A). The gut and skin samples did not  
289 share any unique OTUs in common at species level (Fig. S4B).

290

### 291 **Taxonomic and functional characteristics of bacteria between the gut and skin**

#### 292 **microbiota**

293 We investigated differences in the gut and skin samples of *I. bannanicus* larvae at OTU level.  
294 We analysed the enrichment according to their taxonomy using Manhattan plot (Fig. 4). In  
295 both samples, OTUs enriched in *I. bannanicus* belonged to wide range of bacterial phyla

296 including Acidobacteria, Actinobacteria, Bacteroidetes, Chloroflexi, Cyanobacteria,  
297 Firmicutes, Planctomycetes, Proteobacteria and Verrucomicrobia (False Discovery Rate  
298 (FDR) adjusted  $P < 0.05$ , Wilcoxon rank-sum test; Fig. 4).

299

### 300 **Linear discriminant analysis effect size (LEfSe)**

301 We compared the compositional similarity between the gut and skin samples of *I. bannanicus*  
302 larvae by calculating the pairwise distance among OTU abundance (Fig. 5A). The LEfSe  
303 analysis was used to analyse the species abundance between the gut and skin samples in *I.*  
304 *bannanicus*, which showed that there are 52 biomarkers with an LDA score  $> 4$ . A cladogram  
305 representing microbial taxa enriched in gut (red colour) versus skin (green colour) samples of  
306 *I. bannanicus* is presented in Fig. 5B.

307

### 308 **Microbial interaction in the gut samples of *I. bannanicus***

309 The 16S rRNA sequencing data was used to create microbial interactions in the gut samples,  
310 which provided potential interaction patterns of microbes (Fig. 6). The network map created  
311 for bacterial interactions showed nodes and connections as presented in Fig. 6 (network  
312 diameter = 15; modularity = 0.521; clustering coefficient = 0.484; graph density = 0.0316;  
313 average degree = 11.827; average path length = 5.085).

314

## 315 **DISCUSSION**

316 The advent of next-generation sequencing technologies (NGS) has helped unravel the  
317 complex host-microbial interactions, especially in terms of estimating microbial diversity.  
318 The older culture-dependent methods, which are tedious to implement, are being replaced by  
319 culture-independent ones, leading to a rapid accumulation of data on microbiome diversity.  
320 Our analysis of the BM of caecilians too, has been made possible through this.

321 Amphibian skin provides a suitable environment for rich communities of  
322 microorganisms to flourish. These play an important role as symbionts that aid in protection  
323 (pathogens, diseases, infections) and physiological functions such as electrolyte exchange  
324 and respiration. The bacteria found in the gut contribute to the nutritive functions. The central  
325 idea of our study was to characterize the BM of *I. bannanicus* larvae, which had previously  
326 not been studied. As the larvae of caecilians are unique among amphibians in being  
327 carnivorous, we hypothesized that the gut microbiota of *I. bannanicus* would be distinct at a  
328 higher taxonomic level. Our study shows that some of the unspecialized bacterial species are  
329 shared between the gut and skin . This is probably aided by the aquatic medium that they  
330 inhabit. A study of redback salamanders showed that the bacterium *Janthinobacterium*  
331 *lividum*, which plays a protective role, was able to survive passage through the gut,  
332 suggesting that the gut could act as a reservoir for protective skin bacteria (*Wiggins et al.*,  
333 *2011*). The skin BM is directly influenced by the external environment, which the gut BM is  
334 mediated by internal factors that aid in digestion. Thus, the gut and skin have different  
335 influencing gradients that determine the colonization and re-colonization of the BMs.

336 Members of Actinobacteria, Bacteroidetes, Firmicutes and Verrucomicrobia are seen  
337 to be shared in all gut samples of *I. bannanicus* larvae. In total 32 OTUs occur in common in  
338 all gut samples. Members of phylum Actinobacteria, Bacteroidetes, Chloroflexi,  
339 Gemmatimonadetes and Proteobacteria are seen to be shared in all skin samples of *I.*  
340 *bannanicus* larvae. In total 61 OTUs seen to co-occur in all skin samples. Our analysis shows  
341 that, bacterial diversity (at species level) was high on skin when compared to the gut samples.  
342 Also, skin and gut seem to harbor unique specialized bacteria that may be essential to  
343 perform certain functions. Few species of bacteria were seen to co-occur in both gut and skin  
344 samples; these species might be part of the gut-skin axis in larvae of *I. bannanicus*, which we  
345 consider to be unspecialized in function. Results of our study suggests that skin, acting in the

346 capacity of not only a barrier but also as a respiratory surface, is more influenced by external  
347 abiotic factors when compared to gut, where bacterial diversity is higher when compared to  
348 the gut BM.

349 By consuming oxygen and lowering redox potential in the gut environment,  
350 proteobacteria are thought to play a vital role in preparing the gut for colonization of  
351 anaerobes that are required for healthy gut function (*Moon et al., 2018*). Proteobacteria and  
352 Actinobacteria strongly affect normal microbiota composition. Actinobacteria play an  
353 important role in the decomposition of organic materials. Bacteroidetes are known contribute  
354 to the preservation of gut microbalance, immune system development, polysaccharide  
355 degradation, and nutritional use acceleration (*Tong et al., 2019a*). Firmicutes aid in digestion,  
356 support immune functions and also influence behaviour in animals. Firmicutes help in  
357 carbohydrate fermentation and nutrient absorption (*Tong et al., 2019a*). Previous studies  
358 report that the Firmicutes - Bacteroidetes ratio indicates a higher efficiency of energy uptake  
359 from food (*Tong et al., 2019a*), which thereby enhances fitness. Microbes belonging to the  
360 Verrucomicrobia are mucin-degrading bacteria that play a major role in glucose homeostasis  
361 and contribute to intestinal health.

362 Comparative fecal sample analysis conducted between larvae belonging to amphibian  
363 orders showed that in case of anuran tadpoles, the most dominant gut bacterial phyla were  
364 Proteobacteria > Fusobacteria > Firmicutes > Bacteroidetes > Cyanobacteria, whereas in case  
365 of caecilian larvae the relative dominance of bacterial phyla was Bacteroidetes >  
366 Proteobacteria > Firmicutes > Verrucomicrobia > Actinobacteria. Further, in the case of  
367 salamander larvae, the most dominant bacterial phyla were Proteobacteria > Bacteroidetes >  
368 Firmicutes > Actinobacteria > Verrucomicrobia. Anurans constitute predominantly of  
369 Cyanobacteria, whereas in case of caecilians and salamanders (*Sanchez et al., 2017*),  
370 Verrucomicrobia and Actinobacteria were represented (comparison made only among the

371 most dominant five phyla). Our study shows that though the bacterial diversity overlaps to  
372 some extent, the species abundance of dominant phyla was different. The similarities  
373 between the caecilian and salamander microbiota can be corelated with the aquatic phase of  
374 their life history stage. Unlike in other amphibians, caecilian skin is highly glandular and  
375 secretes substances that are important for chemical defense against predators and  
376 microorganisms (*Duellman & Trueb, 1986; Jared et al., 1999*).

377         The data presented here are based on *ex situ* studies. It is not yet known whether the  
378 skin and gut microbiomes of larval *I. bannanicus* inhabiting natural environments would also  
379 comprise of above-mentioned bacterial phyla. We assume that the caecilian larvae would also  
380 have similar core microbiomes, as shown to be the case in a study conducted in fire  
381 salamanders (*Demircan et al., 2018*). Diet preferences in wild, for the caecilian larvae may  
382 have differential prey choices including the Chironomous larvae. Thus, to some extent the gut  
383 microbiome would have more diversity than the laboratory reared individuals. The caecilian  
384 larvae inhabiting in natural water bodies are exposed to various hetero-specific individuals,  
385 contributing to the additional microbes on skin. Although the bacterial microbiomes  
386 occurring in gut and skin of caecilian larvae in wild may vary to some extent than our  
387 laboratory based study, organisms are now known to maintain a core microbiome despite  
388 changes in environment (*Tong et al., 2019a*). In our study, all the test subjects survived the  
389 period of experimentation, during which no morbidity was observed.

390

## 391 **CONCLUSION**

392 Microbes colonize virtually all epithelial surfaces, lumen and mucosa of organisms, wherein  
393 they often outnumber the somatic cells of their hosts, implying the importance of  
394 microorganisms in host physiology (*Hanning & Diaz-Sanchez, 2015; Davenport et al.,*  
395 *2017*). The present study contributes to the bacterial characterization of gut and skin of *I.*



396 *bannanicus* using 16S rRNA gene amplicon sequencing. The study provides a comprehensive  
397 account of the gut and skin BM of *I. bannanicus*, the only caecilian species in China. Our  
398 study reveals that though the bacterial diversity of the gut partially overlaps among larvae of  
399 the three amphibian orders, the relative abundance of the dominant phyla remains distinct.  
400 We also show that the skin BM is more diverse than the gut BM. The findings suggest that  
401 specific microbes play an important role in an individual, which promotes metabolic  
402 flexibility, adaptation to the changing environment, protection from diseases and infections.  
403 Thus, understanding the microbial communities and describing the local bacterial  
404 communities associated with gut and skin of *I. bannanicus* larvae is important. The  
405 knowledge generated by this study forms a foundation for further exploration of the BM of  
406 Gymnophiona and facilitates comparisons of the BMs of larvae across the amphibian orders.

407

#### 408 **Acknowledgements**

409 We thank Cheng-Hai Fu for the maintenance of animals during the study.

410

#### 411 **Funding**

412 This study was financially supported by the funding from Guangxi University Special Talent  
413 Recruitment Grant to Madhava Meegaskumbura. This study was also supported by the  
414 Postdoctoral Project from Guangxi University to Amrapali Prithvisingh Rajput.

415

#### 416 **Competing interests**

417 The authors declare that the research was conducted in the absence of any commercial or  
418 financial relationships that could be construed as a potential conflict of interest.

419

#### 420 **Author contributions**

421 • Amrapali Prithvisingh Rajput conceived and designed the experiments, performed the  
422 experiments, analyzed the data, wrote the manuscript with revisions from Madhava  
423 Meegaskumbura, prepared figures and tables, and drafted the successive versions of this  
424 paper.

425 • Zhou Shipeng made figures, reviewed and edited the draft.

426 • Madhava Meegaskumbura conceived and designed the experiments, authored or reviewed  
427 drafts of the paper and approved the final draft.

428

#### 429 **Animal ethics**

430 This study was carried out in accordance with the recommendations of Institutional Animal  
431 Care and Use Committee of Guangxi University (GXU), Nanning-China. Animal procedures  
432 were approved by GXU (GXU2019-071).

433

#### 434 **Data availability**

435 All data pertaining to the study will be made available on GenBank (upon acceptance).

436

#### 437 **REFERENCES**

438 **AmphibiaWeb:** Information on amphibian biology and conservation (Web application).

439 **2021** California: AmphibiaWeb: Berkeley, USA.

440 **Bletz MC, Loudon AH, Becker MH, Bell SC, Woodhams DC, Minbiole KPC, Harris**

441 **RN. 2013.** Mitigating amphibian chytridiomycosis with bioaugmentation:

442 characteristics of effective probiotics and strategies for their selection and use. *Ecology*

443 *Letters*, **16**: 807-820 Doi.org/10.1111/212.12099

444 **Bletz MC, Goedbloed DJ, Sanchez E, Reinhardt T, Tebbe CC, Bhujju S, Geffers R,**

445 **Jarek M, Vences M, Steinfartz S. 2016.** Amphibian gut microbiota shifts

- 446 differentially in community structure but converges on habitat-specific predicted  
447 functions. *Nature Communications* **7**:13699 Doi: 10.1038/ncomms13699.
- 448 **Caporaso JG, Kuczynski J, Stombaugh J, Bittinger K, Bushman FD, Costello EK,**  
449 **Fierer N, Pena AG, Goodrich JK, Gordon JI, Huttley GA, Kelley ST, Knights D,**  
450 **Koenig JE, Ley RE, Lozupone CA, McDonald D, Muegge BD, Pirrung M,**  
451 **Reeder J, Sevinsky JR, Turnbaugh PJ, Walters WA, Widmann J, Yatsunenko T,**  
452 **Zaneveld J, Knight R. 2010.** QIIME allows analysis of high-throughput community  
453 sequencing data. *Nature Methods* **7(5)**:335–336 Doi: 10.1038/nmeth.f.303.
- 454 **Chang CW, Huang BH, Lin SM, Huang CL, Liao PC. 2016.** Changes of diet and  
455 dominant intestinal microbes in farmland frogs. *BMC Microbiology* **16**:33  
456 Doi.org/10.1186/s12866-016-0660-4.
- 457 **Colombo BM, Sacalvenzi T, Benlamara S, Pollet N. 2015.** Microbiota and mucosal  
458 immunity in amphibians. *Frontiers in Immunology* **6**:111  
459 [Doi.org/10.3389/fimmu.2015.00111](https://doi.org/10.3389/fimmu.2015.00111).
- 460 **Davenport ER, Sanders JG, Song SJ, Amato KR, Clark AG, Knight R. 2017.** The human  
461 microbiome in evolution. *BMC Biology* **15**:127 Doi.org/10.1186/s12915-017-0454-7.
- 462 **Demircan T, Ovezmyradov G, Yildirim B, Keskin I, Ilhan AE, Fescioglu EC, Ozturk G,**  
463 **Yildirim S. 2018.** Experimentally induced metamorphosis in highly regenerative  
464 axolotl (*Ambystoma mexicanum*) under constant diet restructures microbiota. *Scientific*  
465 *Reports* **8(1)**:10974 Doi:10.1038/s41598-018-29373-y.
- 466 **Duellman WE, Trueb L. 1986.** Biology of Amphibians. John Hopkins Press, USA.
- 467 **Dunker N, Wake WH, Olson WM. 2000.** Embryonic and larval development in the  
468 caecilian *Ichthyophis kohtaoensis* (Amphibia, Gymnophiona): a staging table. *Journal*  
469 *of Morphology* **243(1)**:3–34.

- 470 **Edgar RC. 2010.** Search and clustering orders of magnitude faster than BLAST.  
471 *Bioinformatics* **26(19)**:2460–2461 Doi: 10.1093/bioinformatics/btq461.
- 472 **Hanning I, Diaz-Sanchez S. 2015.** The functionality of the gastrointestinal microbiome in  
473 non-human animals. *Microbiome* **3**:51 Doi.org/10.1186/s40168-015-0113-6.
- 474 **Huang BH, Chang CH, Huang CW, Gao J, Liao, PC. 2018.** Composition and functional  
475 specialists of the gut microbiota of frogs reflect habitat differences and agricultural  
476 activity. *Frontiers in Microbiology* **8**:2670 Doi.org/10.3389/fmicb.2017.02670.
- 477 **Jared C, Navas AA, Toledo RC. 1999.** An appreciation of the physiology and morphology  
478 of the caecilians (Amphibia: Gymnophiona). *Comparative Biochemistry and*  
479 *Physiology Part A* **123**:313–328.
- 480 **Knutie SA, Wilkinson CL, Kohl KD, Rohr JR. 2017.** Early-life disruption of amphibian  
481 microbiota decreases later-life resistance to parasites. *Nature Communications* **8(86)**  
482 Doi.org/10.1038/s41467-017-0019-0.
- 483 **Kohl KD, Cary TL, Karasov WH, Dearing MD. 2013.** Restructuring of the amphibian gut  
484 microbiota through metamorphosis. *Environmental Microbiology Reports* **5(6)**:899–  
485 903 Doi:10.1111/1758-2229.12092.
- 486 **Kohl KD, Amaya J, Passement CA, Dearing MD, McCue MD. 2014.** Unique and shared  
487 responses of the gut microbiota to prolonged fasting: a comparative study across five  
488 classes of vertebrate hosts. *FEMS Microbiology Ecology* **90(3)**:883–894 Doi:  
489 10.1111/1574-6941.12442.
- 490 **Kohl KD, Cary TL, Karasov WH, Dearing MD. 2015.** Larval exposure to polychlorinated  
491 biphenyl 126 (PCB-126) causes persistent alteration of the amphibian gut microbiota.  
492 *Environmental Toxicology and Chemistry* **34(5)**:1113–1118 Doi:10.1002/etc.2905.
- 493 **Li G, Bei Y, Tan Y, Meng S, Xie W, Li, J. 2010.** Observations of the reared  
494 caecilian, *Ichthyophis bannanica*. *Sichuan Journal of Zoology* **29**:81–84.

- 495 **Liu YX, Qin Y, Chen T, et al. 2015.** A practical guide to amplicon and metagenomic  
496 analysis of microbiome data. *Protein Cell* 12:315-330 Doi.org/10.1007/s13238-020-  
497 00724-8.
- 498 **Long J, Xiang J, He T, Zhang N, Pan W. 2020.** Gut microbiota differences during  
499 metamorphosis in sick and healthy giant spiny frogs (*Paa spinosa*) tadpoles. *Letters in*  
500 *Applied Microbiology* 70(2):109–117 Doi.org/10.1111/lam.13251.
- 501 **Lozupone C, Knight R. 2005.** UniFrac: a new phylogenetic method for comparing microbial  
502 communities. *Applied and Environmental Microbiology* 71(12):8228–8235  
503 Doi:10.1128/AEM.71.12.8228-8235.2005.
- 504 **Lyra ML, Bletz MC, Haddad CFB, Vences M. 2018.** The intestinal microbiota of tadpoles  
505 differs from those of syntopic aquatic invertebrates. *Microbial Ecology* 76(1):121–124  
506 Doi:10.1007/s00248-017-1109-5.
- 507 **Mashoof S, Goodroe A, Du CC, Eubanks JO, Jacobs N, Steiner JM, Tizard I,**  
508 **Suchodolski JS, Criscitiello. 2013.** Ancient T-independence of mucosal IgX/A: gut  
509 microbiota unaffected by larval thymectomy in *Xenopus laevis*. *Mucosal Immunology*  
510 6(2):358–368 Doi:10.1038/mi.2012.78.
- 511 **McDiarmid RW, Altig R. 1999.** Tadpoles: The Biology of Anuran Tadpoles. The University  
512 of Chicago Press, USA.
- 513 **Meng S, Li G. 2006.** Research advances of *Ichthyophis bannanicus*. *Sichuan Journal of*  
514 *Zoology* 25:423–425.
- 515 **Moon CD, Young W, Maclean HP, Cookson AL, Bermingham NE. 2018.** Metagenomic  
516 insights into the roles of Proteobacteria in the gastrointestinal microbiomes of healthy  
517 dogs and cats. *MicrobiologyOpen* 7:e677 Doi.org/10.1002/mb03.677.

- 518 **Mu D, Meng J, Bo X, Wu M, Xiao H, Wang, H. 2018.** The effect of cadmium exposure on  
519 diversity of intestinal microbial community of *Rana chensinensis* tadpoles.  
520 *Ecotoxicology and Environmental Safety* **154**:6–12 Doi:10.1016/j.ecoenv.2018.02.022.
- 521 **Rebollar EA, Martinez-Ugalde E, Orta AH. 2020.** The amphibian skin microbiome and its  
522 protective role against chytridiomycosis. *Herpetologica* **76(2)**:167-177  
523 Doi:10.1655/0018-0831-76.2.167-177.
- 524 **Rideout RJ, He Y, Navas-Molina JA. et al. 2014.** Subsampled open-reference clustering  
525 creates consistent, comprehensive OTU definitions and scales to billions of sequences.  
526 *PeerJ* **2**:e545 Doi.10.7717/peerj.545.
- 527 **Sanchez E, Bletz MC, Duntsch L, Bhuju S, Geffers R, Jarek M, Dohrmann AB, Tebbe**  
528 **CC, Steinfartz S, Vences M. 2017.** Cutaneous bacterial communities of a poisonous  
529 salamander: a perspective from life stages, body parts and environmental conditions.  
530 *Microbial Ecology* **73(2)**:455–465 Doi.10.1007/s00248-016-0863-0.
- 531 **Segata N, Izard J, Waldron L, Gevers D, Miropolsky L, Garrett WS, Huttenhower C.**  
532 **2011.** Metagenomic biomarker discovery and explanation. *Genome Biology* **12**:R60  
533 Doi.10.1186/gb-2011-12-6-r60.
- 534 **Taylor EH. 1968.** The caecilians of the world: a taxonomic review. Kansas: University of  
535 Kansas Press, USA.
- 536 **Tong Q, Liu XN, Hu ZF, Ding JF, Bie J, Wang HB, Zhang JT. 2019a.** Effects of captivity  
537 and seasons on the gut microbiota of the brown frog (*Rana dybowskii*). *Frontiers in*  
538 *Microbiology* **10**:1912 Doi.10389/fmic.2019.01912.
- 539 **Tong Q, Du XP, Hu ZF, Cui LY, Bie J, Zhang QZ, Xiao JH, Lin Yu, Wang HB. 2019b.**  
540 Comparison of the gut microbiota of *Rana amurensis* and *Rana dybowskii* under natural  
541 winter fasting conditions. *FEMS Microbiology Letters* **366(21)**:fnz241  
542 Doi.10.1093/femsle/fnz241.

- 543 **Vences M, Lyra ML, Kueneman JG, Bletz MC, Archer HM, Canitz J, Handreck S,**  
544 **Ranrianiain RD, Struck U, Bhuju S, Jarek M, Geffers R, McKenzie VJ, Tebbe**  
545 **CC, Haddad CFB, Glos J. 2016.** Gut bacterial communities across tadpole  
546 ectomorphs in two diverse tropical anuran faunas. *The Science of Nature* 103:1–14  
547 [Doi.org/10.1007/s00114-016-1348-1](https://doi.org/10.1007/s00114-016-1348-1).
- 548 **Wang H, Luo X, Meng S, Bei Y, Song T, Meng T. et al. 2015.** The phylogeography and  
549 population demography of the Yunnan caecilian (*Ichthyophis bannanicus*): massive  
550 rivers as barriers to gene flow. *PLoS ONE* 10(4):e0125770  
551 [Doi:10.1371/journal.pone.0125770](https://doi.org/10.1371/journal.pone.0125770).
- 552 **Warne RW, Kirschman L, Zeglin L. 2017.** Manipulation of gut microbiota reveals shifting  
553 community structure shaped by host developmental windows in amphibian larvae.  
554 *Integrative and Comparative Biology* 57(4):786–794 [Doi.org/10.1093/icb/ix100](https://doi.org/10.1093/icb/ix100).
- 555 **Warne RW, Kirschman L, Zeglin L. 2019.** Manipulation of gut microbiota during critical  
556 developmental windows affects host physiological performance and disease  
557 susceptibility across ontogeny. *Journal of Animal Ecology* 88:845–856  
558 [Doi.org/10.1111/1365-2656.12973](https://doi.org/10.1111/1365-2656.12973).
- 559 **Weng FCH, Yang YJ, Wang D. 2016.** Functional analysis for gut microbes of the brown  
560 tree frog (*Polypedates megacephalus*) in artificial hibernation. *BMC Genomics* 17:1024  
561 [Doi.org/10.1186/s12864-016-3318-6](https://doi.org/10.1186/s12864-016-3318-6).
- 562 **Wiggins PJ, Smith JM, Harris RN, Minbiole PC. 2011.** Gut of red-backed salamanders  
563 (*Plethodon cinereus*) may serve as a reservoir for an antifungal cutaneous bacterium.  
564 *Journal of Herpetology* 45:329–332 [Doi.org/10.1670/10-2311](https://doi.org/10.1670/10-2311).
- 565 **Wilbur HM. 1980.** Complex life cycles. *Annual Review of Ecology and Systematics* 11:67–  
566 93.

- 567 **Woodhams DC, Bosch J, Briggs CJ, Cashins S, Davis LR, Lauer A, Muths E,**  
568 **Puschendorf R, Schmidt BR, Sheafor B, Voyles J. 2011.** Mitigating amphibian  
569 disease: strategies to maintain wild populations and control chytridiomycosis. *Frontiers*  
570 *in Zoology* **8**:8 Doi.org/10.1186/1742-9994-8-8.
- 571 **Xu LL, Chen H, Zhang M, Zhu W, Chang Q, Lu G, Chen Y, Jiang J, Zhu L. 2020.**  
572 Changes in the community structure of the symbiotic microbes of wild amphibians  
573 from the eastern edge of the Tibetan Plateau. *MicrobiologyOpen* **9(4)**:e1004  
574 Doi.org/10.1002/mb03.1004.
- 575 **Ya J, Ju Z, Wang H, Zhao H. 2019.** Exposure to cadmium induced gut histopathological  
576 damages and microbiota alterations of Chinese toad (*Bufo gargarizans*) larvae.  
577 *Ecotoxicology and Environmental Safety* **180**:449–456  
578 Doi:10.1016/j.ecoenv.2019.05.038.
- 579 **Zhang W, Guo R, Yang Y, Ding J, Zhang Y. 2016.** Long-term effect of heavy metal  
580 pollution on diversity of gastrointestinal microbial community of *Bufo raddei*.  
581 *Toxicology Letters* **258**:192–197 Doi:10.1016/j.toxlet.2016.07.003.
- 582 **Zhang M, Gaughan S, Chang Q, Chen Q, Lu G, Wang X, Xu L, Zhu L, Jiang J. 2018.**  
583 Age-related changes in the gut microbiota of the Chinese giant salamander (*Andrias*  
584  *davidianus*). *MicrobiologyOpen* **8(7)**:e778 Doi.org/10.1002/mbo3.778.
- 585 **Zhang M, Chen H, Liu L, Xu L, Wang X, Chang L, Chang Q, Lu G, Jiang J, Zhu L.**  
586 **2020.** The changes in the frog gut microbiome and its putative oxygen-related  
587 phenotypes accompanying the development of gastrointestinal complexity and dietary  
588 shift. *Frontiers in Microbiology* **11**:162 Doi.org/10.3389/fmicb.2020.00162.  
589  
590  
591



592 **Table 1 The microbial diversity index including Chao1, ACE, Simpson and Shannon of**  
593 **16S rRNA sequence library from 13 individuals of *Ichthyophis bannanicus* at a given**  
594 **rarefied depth.**

| Diversity index  | Gut sample | Skin sample |
|------------------|------------|-------------|
| Observed species | 436        | 966         |
| Shannon          | 4.453      | 4.717       |
| Simpson          | 0.874      | 0.836       |
| ACE              | 491.046    | 1096.715    |
| Chao1            | 505.725    | 1141.309    |
| Goods coverage   | 0.998      | 0.995       |
| PD whole tree    | 52.002     | 121.213     |

601

602 MAIN FIGURES

603

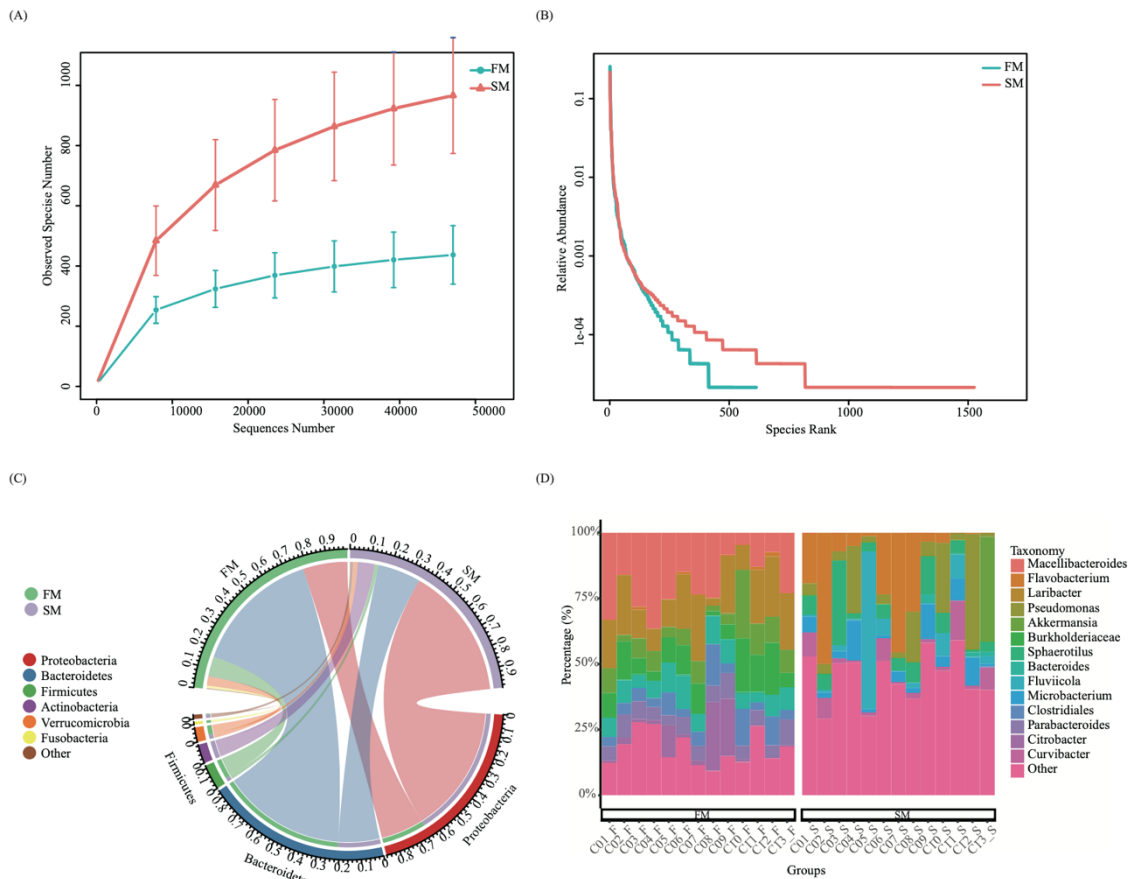

604

605 **Figure 1 (A) The rarefaction analysis of the microbe species from gut (FM) and skin**

606 **(SM) of *I. bannanicus* larvae; (B) The rank abundance curve analysis of the microbe**

607 **species from gut (FM) and skin (SM) of *I. bannanicus* larvae; (C) Circular layout:**

608 **Phylum level distribution of bacterial taxa of gut (FM) and skin (SM) in *I. bannanicus***

609 **larvae; (D) Distribution of bacterial taxa of gut (C01\_F-C13\_F) and skin (C01\_S-**

610 **C13\_S) in *I. bannanicus* larvae genus level.**

611

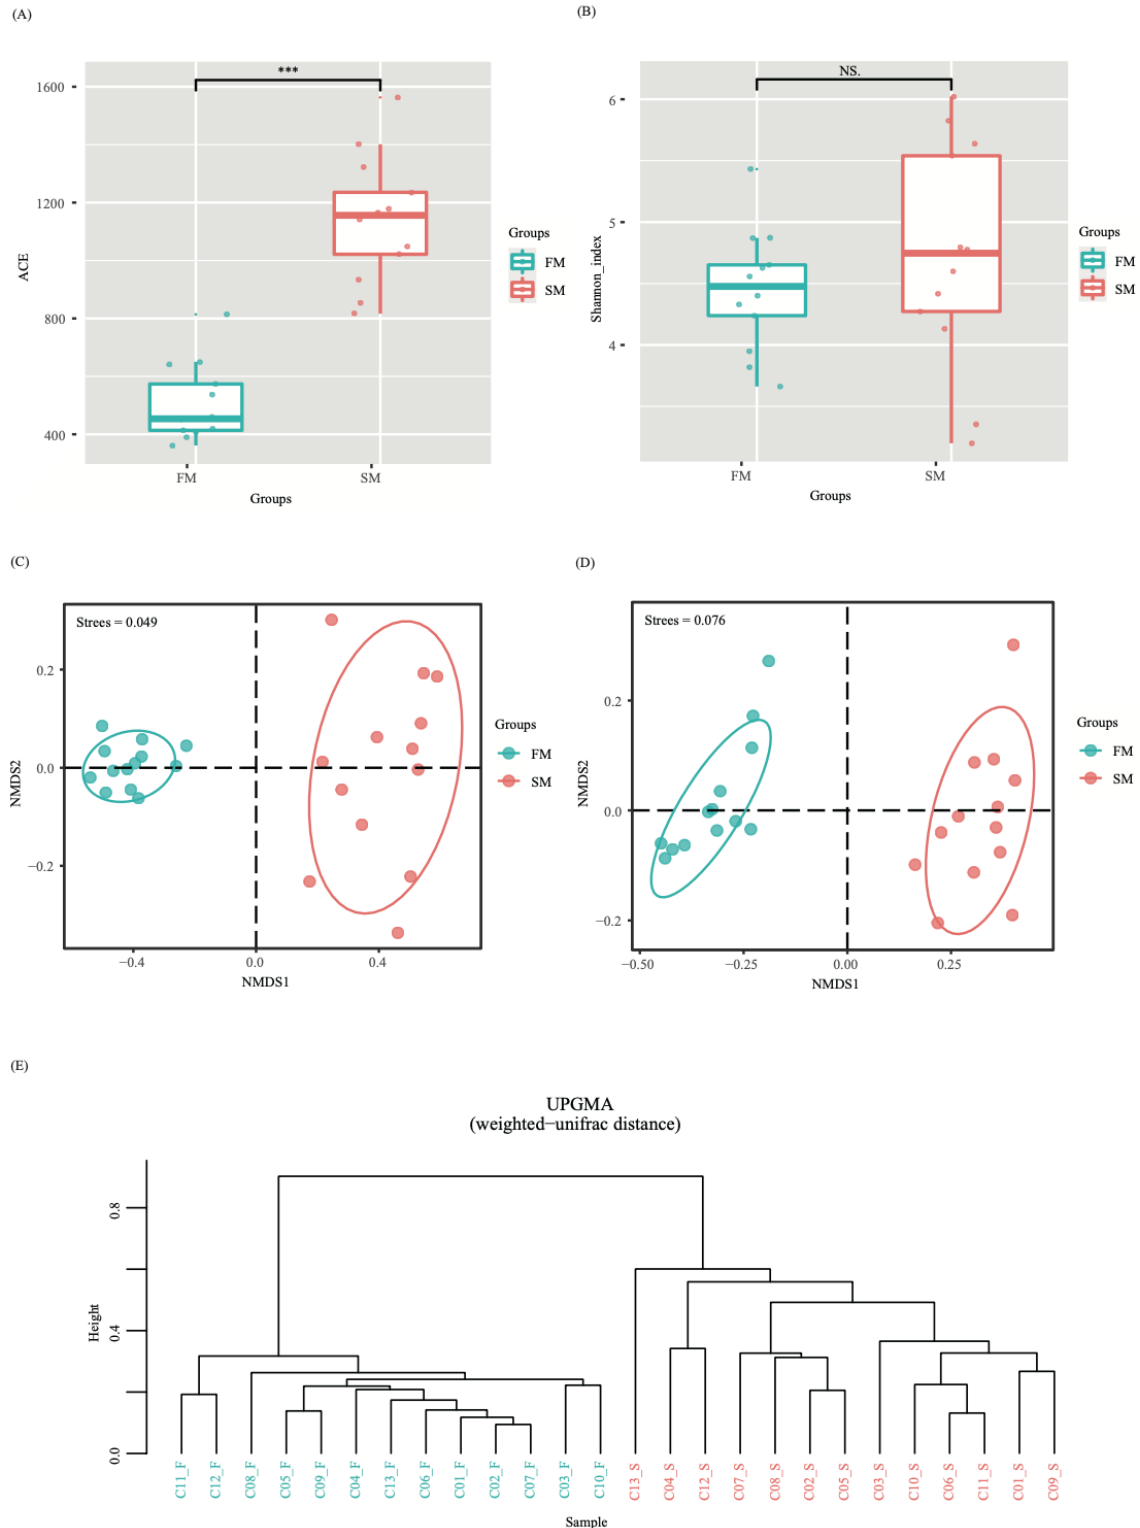

612

613 **Figure 2 Diversity analysis of gut (FM) and skin (SM) microbial composition in larvae**

614 **of *I. bannanicus* ( $N = 13$ ). (A) ACE index; (B) Shannon index. The bottom and top of the**

615 **box are the first and third quartiles, the band inside the box is the median, and the ends**

616 of the whiskers represent the minimum and maximum. Asterisk indicates significant  
617 difference ( $P < 0.001$ , paired Wilcoxon test). NS indicates no significant difference between  
618 groups. (C) Non-metric multidimensional scaling (NMDS) analysis with weighed  
619 unifrac distance ( $R = 0.99$ ;  $P = 0.001$ ; ANOSIM test was performed) showing bacterial  
620 composition across gut (FM) and skin (SM) samples. (D) Non-metric multidimensional  
621 scaling (NMDS) analysis with unweighed unifrac distance ( $R = 1$ ;  $P = 0.001$ ; ANOSIM  
622 test was performed) showing bacterial composition across gut (FM) and skin (SM)  
623 samples. Each point in the graph represents a sample, the distance between the points  
624 indicate the degree of difference. Samples of the same group are represented in the  
625 same colour. Each group adds to the 80% confidence ellipse in NMDS analysis. (E) The  
626 UPGMA cluster analysis of gut (C01\_F-C13\_F and skin (C01\_S-C13\_S) samples in  
627 weighed Unifrac distances. The figure represents UPGMA cluster tree.  
628

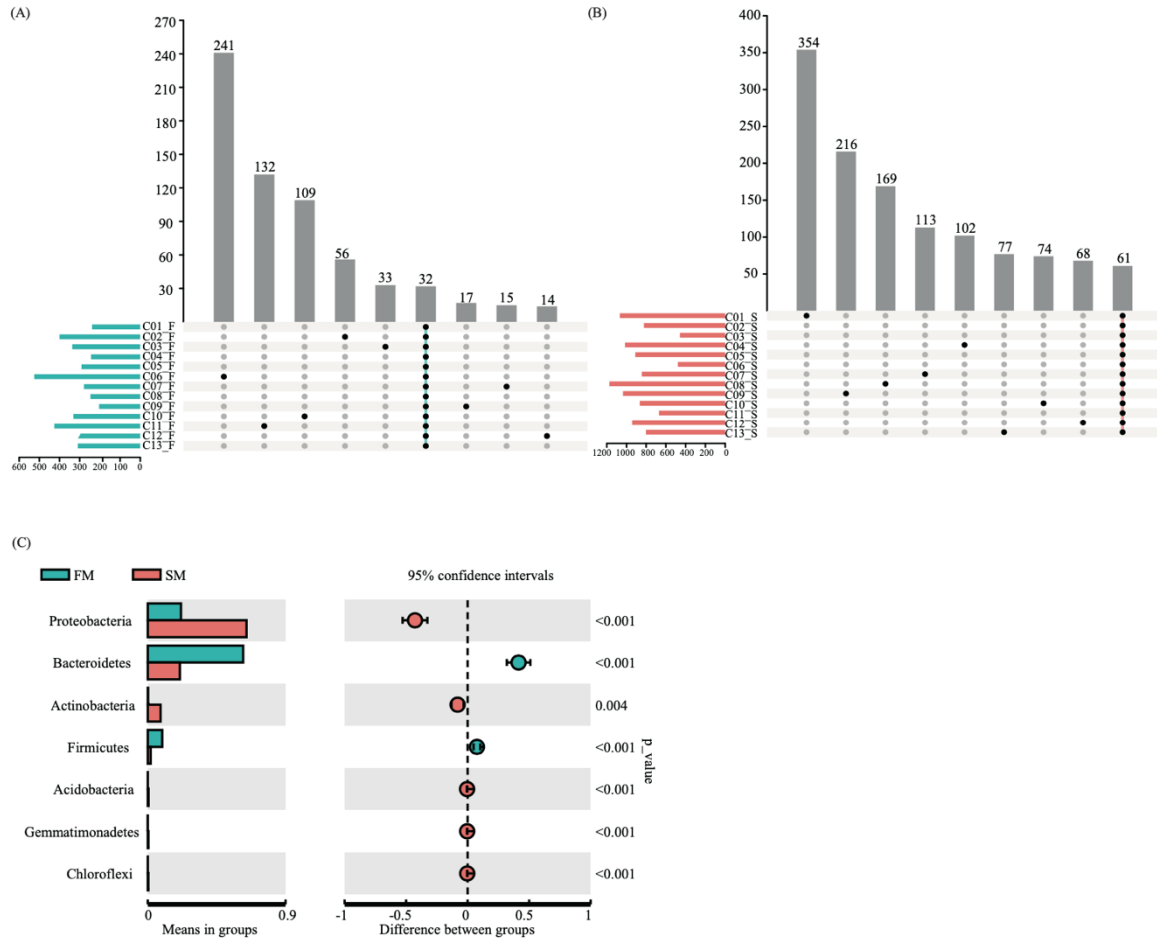

629

630 **Figure 3 (A) Shared bacteria in the gut samples (C01\_F-C13\_F) of *I. bannanicus* larvae;**

631 **(B) Shared bacteria in the skin samples (C01\_S-C13\_S) of *I. bannanicus* larvae; (C)**

632 **Results of t-test between gut (FM) and skin (SM) samples of *I. bannanicus*. Each bar**

633 **represents mean value of the phyla diversity with significant differences ( $P < 0.005$ ) in**

634 **the abundance between groups.**

635

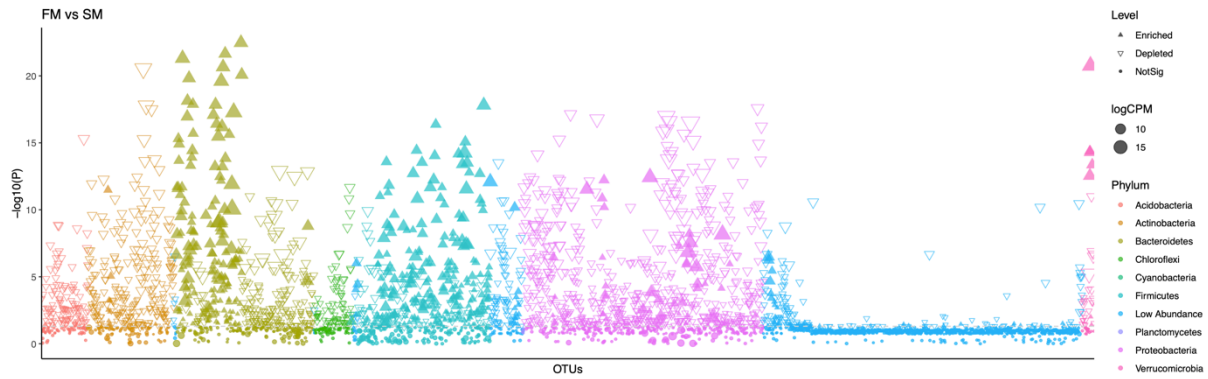

636

637 **Figure 4. Taxonomic and functional characteristics of differential bacteria between the**  
638 **gut and skin microbiota in larvae of *Ichthyophis bannanicus*. Manhattan plot showing**  
639 **OTUs enriched in gut and skin . Each dot or triangle represents a single OTU. OTUs**  
640 **enriched in gut and skin are represented by filled or empty triangles, respectively (False**  
641 **discovery rate (FDR) adjusted  $P < 0.05$ , Wilcoxon rank-sum test). OTUs are arranged**  
642 **in taxonomic order and coloured according to the phylum. Counts per million reads**  
643 **mapped (CMP).**

644

645

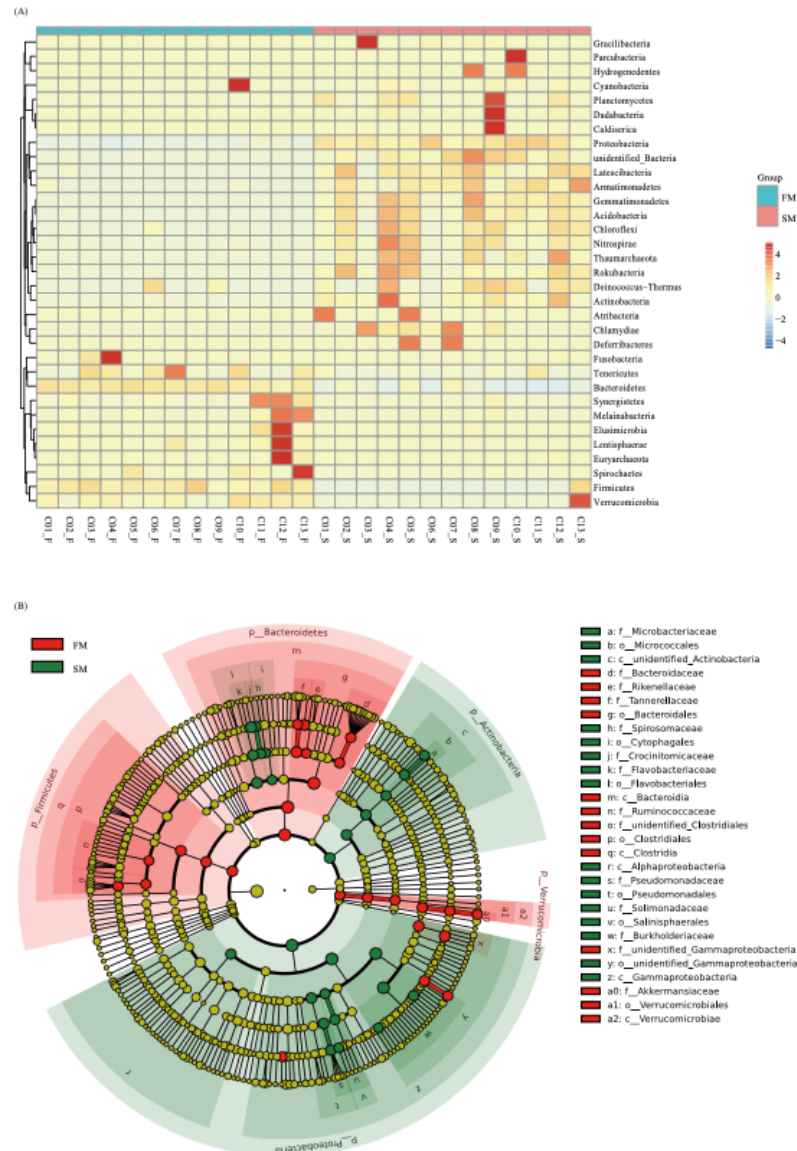

646 **Figure 5 (A) A clustered heatmap illustrating top 33 mean abundances of the bacterial**  
 647 **community taxa assigned to phyla level. The colour scale of higher (red) and lower**  
 648 **(blue) shows the relative abundances of bacterial communities in the gut (C01\_F-**  
 649 **C13\_F) and skin (C01\_S-C13\_S) samples; (B) Linear discriminatory analyses (LEfSe)**  
 650 **of bacterial taxa. LDA value distribution clade map shows abundance of OTUs in**  
 651 **larvae of *I. bannanicus* according to gut (FM) and skin (SM) samples (Biomarkers) with**  
 652 **LDA score > 4. Clade map shows classification level from phylum to genus (circles**  
 653 **radiating from inside to outside). Each small circle at a different classification level**  
 654 **represents a classification at that level, and the diameter of the small circle is**

655 **proportional to the relative abundance in larvae of *I. bannanicus* according to gut and**  
656 **skin samples. The species with no significant difference is uniformly colored yellow and**  
657 **the different species Biomarker follow group colors. The red node indicates the**  
658 **microbial group that plays an important role in the gut samples and the green node**  
659 **indicates the important role in the skin samples. If the microbial groups are missing, it**  
660 **indicates that there is no significant difference in that particular group.**

661



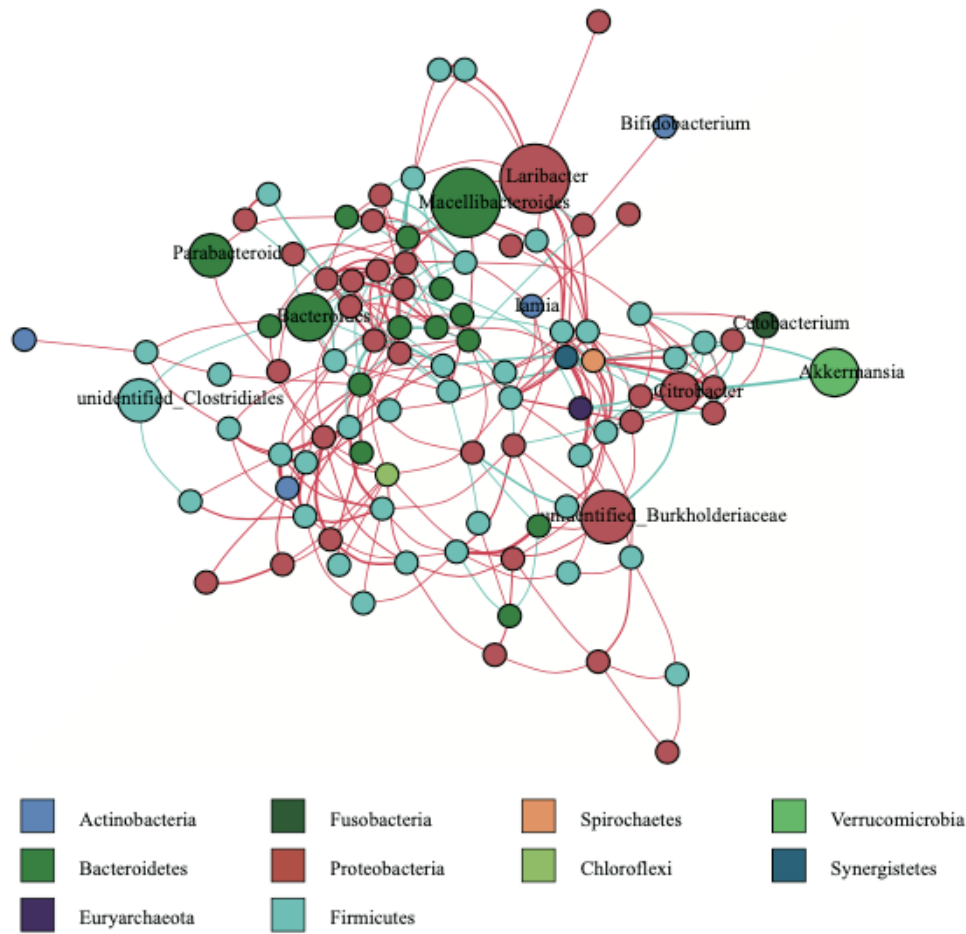

662

663 **Figure 6 Significant co-occurrence and co-exclusion relationships among the**  
664 **abundances of clades in the gut samples ( $N = 13$ ) *I. bannanicus* larvae. Each node**  
665 **represents average relative abundance of the bacterial genera. Nodes of the same**  
666 **phylum have same colour. The thickness of line between the nodes and the correlation**  
667 **coefficient of species interaction are positive in the absolute value. Red colour**  
668 **connections correspond to the positive correlation while blue colour connections**  
669 **correspond to negative correlation.**

670

671
